1 **TRAIT-SPECIFIC TRADE-OFFS PREVENT NICHE EXPANSION IN TWO PARASITES**

2 Eva J. P. Lievens<sup>1,2</sup>, Yannis Michalakis<sup>2,+</sup> and Thomas Lenormand<sup>1,+</sup>

3 <sup>†</sup>equal contribution

4 <sup>1</sup>UMR 5175 CEFE, CNRS–Université de Montpellier–Université P. Valéry–EPHE, 1919 Route de Mende,  
5 34293 Montpellier Cedex 5, France

6 <sup>2</sup>UMR 5290 MIVEGEC, CNRS–IRD–Université de Montpellier, 911 Avenue Agropolis BP 64501, 34394  
7 Montpellier Cedex 5, France

## 8 **ABSTRACT**

9 The evolution of host specialization has been studied intensively, yet it is still often difficult to determine  
10 why parasites do not evolve broader niches – in particular when the available hosts are closely related  
11 and ecologically similar. Here, we used an experimental evolution approach to study the evolution of  
12 host specialization, and its underlying traits, in two sympatric parasites: *Anostracospora rigaudi* and  
13 *Enterocytozpora artemiae*, microsporidians infecting the brine shrimp *Artemia franciscana* and *Artemia*  
14 *parthenogenetica*. In the field, both parasites regularly infect both hosts, yet experimental work has  
15 revealed that they are each partially specialized. We serially passaged the parasites on one, the other, or  
16 an alternation of the two hosts; after ten passages, we assayed the infectivity, virulence, and spore  
17 production rate of the evolved lines. In accordance with previous studies, *A. rigaudi* maintained a higher  
18 fitness on *A. parthenogenetica*, and *E. artemiae* on *A. franciscana*, in all treatments. The origin of this  
19 specialization was not infectivity, which readily evolved and traded off weakly between the host species  
20 for both parasites. Instead, the overall specialization was caused by spore production, which did not  
21 evolve in any treatment. This suggests the existence of a strong trade-off between spore production in  
22 *A. franciscana* and spore production in *A. parthenogenetica*, making this trait a barrier to the evolution  
23 of generalism in this system. This study highlights that the shape of between-host trade-offs can be very  
24 heterogeneous across parasite traits, so that only some traits are pivotal to specialization.

## 25 **KEYWORDS**

26 Ecological specialization, niche, host specificity, experimental evolution, parasite life history, multi-host  
27 parasites, *Artemia*, microsporidians.

## 28 INTRODUCTION

29 Most parasites manifest a degree of specialization in nature, with niches that do not cover the entire  
30 community of potential hosts. This occurs even in communities of ecologically and physiologically similar  
31 host species (e.g. Antonovics et al. 2002, Hall et al. 2009, Streicker et al. 2013, Lievens et al. 2019),  
32 begging the question of why parasites do not evolve to extend their niche. Answering this question is  
33 particularly relevant when trying to predict the future evolution of a parasite, for example with regards  
34 to the emergence of new diseases (Cleaveland et al. 2001) or the impact of invasive hosts (Prenter et al.  
35 2004, Kelly et al. 2009).

36 The evolution of host specialization – i.e. the evolution of parasitic niches – is generally studied through  
37 the lens of ecological specialization theory. A cornerstone of specialization theory is the assumption that  
38 adaptation to one environment trades off with adaptation to another (reviewed in e.g. Futuyma and  
39 Moreno 1988, Kassen 2002, Ravigné et al. 2009). The strength of the fitness trade-offs determines, to a  
40 large degree, whether specialist or generalist strategies evolve: strong trade-offs favor the evolution of  
41 specialists, while weak trade-offs favor the evolution of generalists. At first glance, therefore, we might  
42 view specialism in a parasite population as an indicator that there are strong fitness trade-offs between  
43 the hosts. This would imply that the parasite could never evolve to become a generalist. However,  
44 specialization is also governed by the availability and demography of the different environments (e.g.  
45 Bell and Reboud 1997, Ronce and Kirkpatrick 2001, Ravigné et al. 2009). Low encounter rates with the  
46 alternative host can maintain specialism in spite of weak trade-offs (Benmayor et al. 2009), especially if  
47 that host is an ecological sink (Holt and Gaines 1992, Holt and Hochberg 2002, Lenormand 2002, Ching  
48 et al. 2013). In this case, a demographic change in the host community could indeed prompt a shift  
49 towards generalism in the parasite. This scenario would seem especially likely among similar host  
50 species, where we might expect trade-offs to be weaker (cf. Hereford 2009). To disentangle the  
51 consequences of trade-offs from those of host availability, experimental evolution studies are necessary  
52 (Kassen 2002, Fry 2003).

53 Many experimental evolution studies have been done on host specialization, yielding a variety of  
54 outcomes: evidence for fitness trade-offs (e.g. Turner and Elena 2000, Yourth and Schmid-Hempel 2006,  
55 Agudelo-Romero et al. 2008, Legros and Koella 2010), mixed support for trade-offs (e.g. Agrawal 2000,  
56 Nidelet and Kaltz 2007, Magalhães et al. 2009, Bedhomme et al. 2012, Messina and Durham 2015,  
57 Meaden and Koskella 2017), selection for generalism when host availabilities fluctuate (e.g. Poullain et  
58 al. 2008, Legros and Koella 2010, Bedhomme et al. 2012, Magalhães et al. 2014), and complex effects of

59 migration and host availability (e.g. Benmayor et al. 2009, Ching et al. 2013, Bono et al. 2015). However,  
60 very few experimental evolution studies take the natural context of parasite populations into account.  
61 Doing so can help disentangle the consequences of genetic constraints from the effects of host  
62 availability on the response to selection (see Jaenike and Dombeck 1998, Fellous et al. 2014). In  
63 addition, few studies look for the traits underlying fitness trade-offs. Parasite fitness is a composite of  
64 successful infection, host exploitation, and transmission. Some host specialization studies have shown  
65 that these traits can respond differently to selection on novel hosts (Magalhães et al. 2009, Bedhomme  
66 et al. 2012, Messina and Durham 2015), but their causal effects on parasite evolution have been largely  
67 unexplored (Hall et al. 2017). For example, low fitness in a new host may result from strong trade-offs in  
68 one or a few key traits, or from the accumulation of weak trade-offs in most traits. Only the former can  
69 prevent the evolution of a generalist parasite on the long term, so identifying whether such key traits  
70 occur is crucial to understanding host specialization.

71 In this study, we investigated whether trade-offs in host use limit the evolution of generalism in a  
72 natural host-parasite community, and if so, upon which traits these trade-offs act. We used the  
73 microsporidians *Anostracospora rigaudi* and *Enterocytozoa artemiae* and their sympatric hosts, the  
74 brine shrimp *Artemia parthenogenetica* and *Artemia franciscana*. The two parasites are ecologically  
75 similar, can complete their life cycles on both hosts, and commonly infect both hosts in the field (Rode  
76 et al. 2013b). Nonetheless, they each show a degree of specialization in the lab: *A. rigaudi* has much  
77 higher fitness in *A. parthenogenetica*, while *E. artemiae*'s fitness is much higher in *A. franciscana*  
78 (Lievens et al. 2018). Furthermore, we have shown that *A. franciscana* is a sink host for *A. rigaudi* in the  
79 field, even though prevalences in this host can reach 100%, and that the same may be true for *A.*  
80 *parthenogenetica* and *E. artemiae* (Lievens et al. 2019). This combination of partial specialization and  
81 source-sink demography prompted us to disentangle host availability from trade-offs for these parasites.  
82 We manipulated their host environment by serially passaging them on one, the other, or an alternation  
83 of the two hosts. We then assayed the infectivity, virulence, and spore production rate of the evolved  
84 lines, and asked: [1] did manipulating the host environment affect the degree of specialization of the  
85 parasites?; [2] what was the role of the underlying traits?; and [3] were these results consistent with  
86 trade-offs in host use?

## 87 **METHODS**

## 88 **Hosts and parasites**

### 89 *Natural system*

90 *Artemia* is a genus of small crustaceans occurring in hypersaline environments. Our study system, the  
91 saltern of Aigues-Mortes on the Mediterranean coast of France, contains two sympatric *Artemia* species.  
92 The first, *A. parthenogenetica*, is an asexual clade native to the area; the second, *A. franciscana*, is a  
93 sexual species that was introduced from North America in 1970 and has since become highly prevalent  
94 (Amat et al. 2005, Rode et al. 2013b). *A. parthenogenetica* is present from late spring to fall, while *A.*  
95 *franciscana* occurs year-round. When both species are present, they usually share the same  
96 microhabitats (Lievens et al. 2019).

97 The microsporidians *A. rigaudi* and *E. artemiae* are two of the most prominent parasites infecting  
98 *Artemia* in Aigues-Mortes. *A. rigaudi* is native to France; *E. artemiae* may be native or co-invasive with *A.*  
99 *franciscana* (Rode et al. 2013b). Both species are horizontally transmitted parasites of the gut  
100 epithelium. Infections continuously produce spores, which are released in the infected host's faeces and  
101 ingested by new hosts while filter feeding (Rode et al. 2013a). This causes both survival and reproductive  
102 virulence (Rode et al. 2013b, Lievens et al. 2018), and there is little evidence for recovery (Lievens et al.  
103 unpublished data). In the field, prevalences of over 80% have been recorded for both microsporidians in  
104 both hosts, and coinfections are common (Lievens et al. 2019). Very little is known about coinfections,  
105 though there is circumstantial evidence that established infections can exclude new arrivals (Lievens et  
106 al. 2019).

107 Both *A. rigaudi* and *E. artemiae* are partially specialized: they can complete their life cycles on either  
108 host, but perform much better on one of the two (Lievens et al. 2018). *A. rigaudi*'s fitness is considerably  
109 higher in *A. parthenogenetica*, while *E. artemiae*'s is higher in *A. franciscana*. This is mainly caused by  
110 differences in spore production, although *E. artemiae* is also a poor infector of *A. parthenogenetica* and  
111 *A. rigaudi* exhibits higher-than-optimal virulence in *A. franciscana* (Lievens et al. 2018). The partial  
112 specialization is reflected in their field patterns: *A. rigaudi* cannot persist in nature if *A.*  
113 *parthenogenetica* is absent (Lievens et al. 2019). *A. rigaudi* epidemics therefore end in late fall and must  
114 be re-started every spring (possibly by cold-resistant spores, Lievens et al. unpublished data). It is  
115 unclear whether *E. artemiae* is equally dependent on *A. franciscana* in the field, but we suspect that it is  
116 (Lievens et al. 2019). In the lab, parasites can be maintained on either host.

### 117 *Origin of experimental parasites*

118 We obtained our experimental parasites from the same laboratory stocks of *A. rigaudi* and *E. artemiae*  
119 that were used by Lievens et al. (2019) to estimate infectivity, virulence, and spore production. The  
120 microsporidians in these stocks were collected in Aigues-Mortes and maintained on a mix of both hosts.  
121 Before starting the serial passages, we made sure that the microsporidian stocks were uncontaminated  
122 by using them to infect lab-bred hosts, testing those hosts for the presence of both microsporidians, and  
123 re-starting the stocks from singly infected hosts only (see Supplementary Material for more details).  
124 Note that although we tried to maximize the genetic diversity of our microsporidian stocks by using  
125 spores produced by both host species, originating in several sites and at different times, we do not know  
126 if the resulting populations were genetically diverse or not.

## 127 **Experimental evolution**

128 We serially passaged the microsporidians *A. rigaudi* and *E. artemiae* on the host species *A. franciscana*,  
129 *A. parthenogenetica*, or an alternation of the two. After 10 passages, we assayed the infectivity,  
130 virulence, and spore production of each line, and compared these among treatments.

### 131 *Experimental conditions*

132 See Supplementary Methods.

### 133 *Serial passages*

134 We subjected *A. rigaudi* and *E. artemiae* to serial passaging under three evolutionary treatments: ‘*A. f.*  
135 host’, ‘*A. p.* host’, and ‘Alternating hosts’. In the first two regimes, the parasites encountered *only A.*  
136 *franciscana* or *only A. parthenogenetica*; in the third regime, the parasites encountered alternating  
137 passages of *A. franciscana* and *A. parthenogenetica*. Each microsporidian × treatment combination was  
138 replicated four times, producing a total of 24 parasite lines. Parasites underwent ten serial passages,  
139 each lasting three weeks. The protocol is depicted in Fig. 1; details can be found in the Supplementary  
140 Methods.

141 Two aspects of our passaging protocol should be pointed out: first, the time between passages (three  
142 weeks) is enough to allow infections to be transmitted within passaged groups (Rode et al. 2013a). Thus,  
143 low infection rates at the start of a passage could be compensated by high within-passage transmission.  
144 Second, we did not control the number of spores that were transmitted from one group of hosts to the  
145 next. In all passages after P1, the size of the inoculum depended on the parasite load of the old hosts.  
146 These two aspects meant that the lines were allowed to develop their own infection dynamics, just as

147 they would in the field. Any stochasticity caused by variation in these demographic processes is explicitly  
148 included in the experiment.

#### 149 *Final assays*

150 At the end of the serial passage experiment, we tested the infectivity, virulence, and spore production of  
151 each evolved line in both *A. franciscana* and *A. parthenogenetica*. We tested all surviving parasite lines  
152 based on the spores they produced at the end of P10. We also tested a subset of the parasite lines  
153 based on backup spores collected after P6, which we call the ‘revived’ lines (see Results and Table 1).  
154 Details on spore collection after P6 and P10 can be found in the Supplementary Methods.

155 We performed two final assays (described in Fig. 1, details in the Supplementary Methods). The first  
156 assay tested the infectivity of the evolved lines; it was replicated on 40 *A. parthenogenetica* and 40 *A.*  
157 *franciscana* individuals for each line. In parallel with the first, a second assay tested the virulence and  
158 spore production of each evolved line. This assay was also replicated on 40 *A. parthenogenetica* and 40  
159 *A. franciscana* per evolved line. Because we suspected that there would be fewer infections when *A.*  
160 *parthenogenetica* was exposed to *E. artemiae*, we increased the level of replication for these  
161 combinations, adding an extra 20 *A. parthenogenetica*. We also included 80 control *A. parthenogenetica*  
162 and 80 control *A. franciscana*, which were not exposed to spores but otherwise treated identically.  
163 Spore production was measured by quantifying the number of spores produced by infected individuals  
164 over a two-day period after three weeks of infection; this corresponds to the window for transmission  
165 during the serial passage experiment.

#### 166 **Statistical analyses**

167 All analyses were carried out in R version 3.5.1 (R Core Team 2014), using the packages lme4 (linear  
168 mixed modeling, Bates et al. 2015) and survival (survival analyses, Therneau 2014). Unless stated  
169 otherwise, we built full models with the relevant experimental factors, and tested for the significance of  
170 effects using the likelihood ratio test. The specific models for each analysis are described below. If post-  
171 hoc testing was necessary, we used Tukey HSD tests from the packages multcomp (Hothorn et al. 2008)  
172 and lsmeans (Lenth 2016).

#### 173 *Serial passages*

174 During the serial passage experiment, we collected data on host survival and parasite population size.  
175 Here, we tested whether these variables changed over the course of the experiment.

176 Host survival was quantified as the proportion of surviving hosts in each line at the end of each passage.  
177 Because we did not maintain “control” host populations during the serial passage experiment, host  
178 survival is relative (e.g. survival in ‘Alternating hosts’ vs. ‘*A. f.* host’ treatments), and can only be  
179 compared within host species; we therefore analyzed it separately for *A. franciscana* and *A.*  
180 *parthenogenetica*. Linear mixed models included survival as a binomial response variable, *Treatment*,  
181 *Passage number* (as a continuous variable measuring time), *Parasite species* and all interactions as fixed  
182 effects, and *Line* as a random effect. In addition, we included *Passage* as a random factor, to control for  
183 background variation in the quality of the hosts. Lines where parasites were lost (see Results and Table  
184 1) were excluded.

185 To test whether the parasite population size changed, we built linear mixed models including *Treatment*,  
186 *Passage number* (as a continuous variable measuring time), and their interaction as fixed effects, and  
187 *Line* as a random variable. *A. rigaudi* and *E. artemiae* lines were analyzed separately. The population size  
188 was *ln*-transformed, and zero counts (lost lines) were excluded.

#### 189 *Final assays*

190 In the final assays, we tested the effects of the passaging treatment on the infectivity, virulence, and  
191 spore production of the two parasites; we then compared a composite measure of parasite fitness. For  
192 each variable described below, analyses proceeded as follows. *A. rigaudi* and *E. artemiae* lines were  
193 analyzed separately. We began by testing whether surviving and revived lines were different, looking  
194 only at those treatments that included revived lines (models with fixed effects *Revival*, *Treatment*, *Assay*  
195 *host*, and their interactions). If they were not different, the revived lines were included in the  
196 subsequent analyses (models with fixed effects *Treatment*, *Assay host*, and their interaction). *Line* was  
197 always included as a random variable, or as a frailty variable for survival analyses.

198 Infectivity was analyzed as the proportion of infected individuals at the end of the first assay (a binomial  
199 response) in a generalized linear mixed model. For virulence, the effects of *Treatment* were tested using  
200 log-logistic survival models, stratified over *Assay host* (this allowed the host species to have a different  
201 baseline survival shape). So that the results could be interpreted in terms of survival relative to  
202 uninfected hosts, we included the survival data of the control hosts as an additional *Treatment* category.  
203 However, we excluded any hosts that had been exposed to a parasite but not infected (cf. Lievens et al.  
204 2018)(see Results, Table 2 for the proportion of infected hosts). We also excluded any hosts that died  
205 before day 11 of the assay, because infection could not be reliably detected before this day (see  
206 Supplementary Methods). To analyze the effects on spore production, we used the spore count in the



207 fecal sample as a negative binomial response variable in a generalized linear mixed model. Fecal samples  
208 were only pooled for infected individuals; uninfected hosts were therefore implicitly excluded from the  
209 model.

210 Finally, we used spore production and infectivity to produce a composite fitness measure for each line.  
211 We used a measure of fitness that was representative for the context of the experiment, being the  
212 projected number of infections occurring if the line were passaged onto a new set of susceptible hosts.  
213 We calculated this as the total number of spores produced by the surviving individuals over a two-day  
214 period after three weeks of incubation (thus virulence is implicit), multiplied by the infectiousness of a  
215 single spore. Infectiousness, the probability of a single spore to start an infection, was calculated based  
216 on the results of the first assay. Following an independent action model with birth-death processes, the  
217 infectiousness of one spore is  $-\ln\left(\frac{\text{noninfected}}{\text{exposed}}\right)/D$ , where  $D$  is the spore dose, in our case 750 spores  
218 (Schmid-Hempel 2011, pg. 225-6). We analyzed fitness using a linear mixed model, after  $\ln+1$   
219 transformation.

## 220 RESULTS

### 221 *Serial passages*

222 Of the twenty four parasite lines, four were lost during passaging due to a collapse of the parasite  
223 population (Table 1).

224 At the beginning of passages P5, P6, and P7, exceptionally high mortality occurred in several groups of  
225 new hosts as they were being exposed to the parasites produced by the old hosts (Table 1). These  
226 episodes were concentrated in the treatments 'A. f. host'. To prevent the loss of these lines due to host  
227 population collapse, we added new hosts; if necessary, we repeated the passaging step (see Table 1).

228 Notably, the passaging step from P5 to P6 was repeated three times without success for the line *E.*  
229 *artemiae* × 'A. f. host' – Replicate 4. The transfer was eventually achieved after 6 weeks of incubation in  
230 the P5 hosts, as the other lines were being passaged from P6 to P7. We denote this transfer as 'P5 → P7'  
231 for consistency, but P7 is only the 6<sup>th</sup> passage for this particular line. To investigate whether these  
232 effects were due to increased virulence or demographic effects (increased parasite load), we included  
233 backup spores produced by these lines in the final assays (see below).

234 Host survival was not constant throughout the serial passage experiment, even when the background  
235 variation in host quality was taken into account (Fig. 2). As the passages progressed, the survival of *A.*  
236 *franciscana* in *A. rigaudi* × 'A. f. host' lines decreased as compared to the others (significant triple  
237 interaction,  $\chi^2(2) = 5.5$ ,  $p = 0.02$ , Supp. Table 1; post-hoc  $-4.1 < z < -2.5$ ,  $0.0001 < p < 0.06$ ). Because we  
238 could not separate the background host mortality from parasite-induced effects, we cannot say whether  
239 this change was due to increasing parasite-induced mortality in the *A. rigaudi* × 'A. f. host' lines, or to  
240 decreasing parasite-induced mortality in the other lines. For *A. parthenogenetica*, survival rates became  
241 progressively higher in *A. rigaudi* relative to *E. artemiae* lines, as well as in 'Alternating hosts' relative to  
242 'A. p. host' lines (significant effects of *Parasite species* and *Treatment* in interaction with *Passage*  
243 *number*,  $\chi^2(1) = 11.4$  and  $8.6$ ,  $p < 0.001$  and  $p < 0.01$ , respectively, Supp. Table 1). Again, we could not  
244 distinguish between positive changes in *A. rigaudi* and 'Alternating hosts' lines or negative changes in *E.*  
245 *artemiae* and 'A. p. host' lines.

246 The estimated population size of the parasites also varied through time (Fig. 2). For *A. rigaudi*, the  
247 population grew over the course of the experiment ( $\chi^2(1) = 10.0$ ,  $p < 0.01$  for *Passage number*, Supp.  
248 Table 1), and was significantly larger for lines evolving on *A. parthenogenetica* than for lines evolving on  
249 *A. franciscana* ( $\chi^2(2) = 7.2$ ,  $p = 0.03$  for *Treatment*, Supp. Table 1; post-hoc  $z = 2.7$ ,  $p = 0.02$ ). For *E.*  
250 *artemiae*, only the passaging regime impacted the population size, which was significantly higher in lines  
251 evolving on *A. franciscana* than in those evolving on *A. parthenogenetica* ( $\chi^2(2) = 10.4$ ,  $p < 0.01$  for  
252 *Treatment*, Supp. Table 1; post-hoc  $z = 3.3$ ,  $p < 0.01$ ).

### 253 *Final assays*

254 During the final assays, we tested all surviving evolved lines, as well as a set of lines revived from the  
255 backup P6 spore samples (Table 1). These included all the lines in the combination *E. artemiae* × 'A. f.  
256 host', most of which experienced a period of exceptional mortality during the transmission events  
257 before the end of P6 (Table 1). The two *E. artemiae* × 'Alternating hosts' lines whose P6 hosts were *A.*  
258 *franciscana* (Replicates 1 & 2) were also revived to act as controls for the effect of storage, but revival  
259 was only successful for Replicate 2. Finally, we succeeded in reviving the spores of the lost line *A.*  
260 *rigaudi* × 'A. f. host' – Replicate 2.

261 In the first assay, we tested for effects of passaging treatment on infectivity (Fig. 3, replicates shown in  
262 Supp. Fig. 1). The infectivity of *A. rigaudi* was unaffected by storage effects ( $\chi^2(1) = 1.6$ ,  $p = 0.21$ ), and did  
263 not change in response to passaging treatment ( $\chi^2(2) = 2.8$ ,  $p = 0.25$ , Supp. Table 2); it tended to be  
264 higher in *A. parthenogenetica* ( $\chi^2(1) = 3.7$ ,  $p = 0.054$ , Supp. Table 2). In contrast, the infectivity of *E.*

265 *artemiae* was reduced by storage at 4°C ( $\chi^2(1) = 4.6, p = 0.03$ . dashed lines in Supp. Fig. 1), so the revived  
266 lines were excluded from further analysis. The infectivity of surviving *E. artemiae* lines was generally  
267 higher in *A. franciscana* than in *A. parthenogenetica*, but the difference was less strong after passaging  
268 on 'Alternating hosts' and 'A. p. host' ( $\chi^2(2) = 8.1, p = 0.02$  for interaction effect, Supp. Table 2).

269 In the second assay, we tested for effects of passaging treatment on virulence and spore production  
270 (Fig. 3, replicates shown in Supp. Fig. 2 and 3). As expected, we detected infection in the majority of the  
271 exposed hosts in all host-parasite combinations except *A. parthenogenetica*-*E. artemiae* (Table 4). No  
272 infection was detected for the line *A. rigaudi* × 'A. p. host' – Replicate 1, so it was excluded from further  
273 analyses.

274 For both *A. rigaudi* and *E. artemiae*, parasite-induced mortality was unaffected by storage at 4°C  
275 (respectively  $\chi^2(1.0) = 0.2, p = 0.64$  and  $\chi^2(1.2) = 0.9, p = 0.39$ ). The revived lines were therefore included  
276 in the analyses. Overall, mortality was higher for *A. parthenogenetica*. For *A. rigaudi*, there was an  
277 additional effect of passaging treatment: when assayed on *A. parthenogenetica*, virulence was highest  
278 for lines passaged on *A. franciscana*, intermediate for lines passaged on alternating hosts, and lowest for  
279 lines passaged on *A. parthenogenetica* itself ( $\chi^2(3.0) = 10.4, p = 0.02$  for interaction effect, Supp. Table 2;  
280 Fig. 3, replicates shown in Supp. Fig. 2). For *E. artemiae* lines, background mortality was also higher for  
281 *A. parthenogenetica* ( $\chi^2(4) = 58.1, p < 0.0001$ , Supp. Table 2), but infected hosts did not die faster than  
282 unexposed hosts: virulence was not affected by passaging treatment, nor by the interaction between  
283 treatment and assay host ( $\chi^2(3.6) = 3.7, p = 0.38$  and  $\chi^2(4.5) = 5.8, p = 0.27$ , respectively, Supp. Table 2;  
284 Fig. 3, replicates shown in Supp. Fig. 2).

285 Similarly, spore production at passaging was unaffected by storage at 4°C ( $\chi^2(1) = 0.2, p = 0.69$  for *A.*  
286 *rigaudi*;  $\chi^2(1) = 0.8, p = 0.38$  for *E. artemiae*), so all lines were included in the further analyses. Spore  
287 production was higher in *A. parthenogenetica* for *A. rigaudi* and in *A. franciscana* for *E. artemiae* ( $\chi^2(1) =$   
288 14.8 and = 16.5,  $p = 0.0001$  and  $< 0.0001$ , respectively, Supp. Table 2; Fig. 3, replicates shown in Supp.  
289 Fig. 3). However, there were no effects of treatment, nor of the interaction between treatment and  
290 assay host ( $\chi^2(2) \leq 0.7$  and  $\leq 1.7, p \geq 0.71$  and  $\geq 0.43$ , respectively, Supp. Table 2; Fig. 3, replicates shown  
291 in Supp. Fig. 3).

292 Finally, we analyzed an overall fitness measure for each line: the projected number of hosts that would  
293 be infected at passaging (gray panels in Fig. 3). For *A. rigaudi*, storage at 4°C had no effect on the  
294 composite traits of fitness (see above), so the single revived line was included in the analysis. We also

295 included the line *A. rigaudi* × 'A. p. host' – Replicate 1, which failed to infect hosts in the second assay,  
296 with fitness set to 0 (excluding the line did not change the results). *A. rigaudi* fitness was always higher  
297 when tested on *A. parthenogenetica*, with no effect of passaging treatment, or of the interaction  
298 between treatment and assay host ( $\chi^2(1) = 11.9$ ,  $\chi^2(2) = 2.2$  and  $2.5$ ,  $p < 0.001$ ,  $= 0.34$  and  $= 0.29$ ,  
299 respectively, Supp. Table 2; gray panels in Fig. 3). For *E. artemiae*, in contrast, the patterns of fitness  
300 mirrored those of infectivity. As storage at 4°C affected infectivity (see above), the revived lines were  
301 excluded. *E. artemiae* fitness was always lower in *A. parthenogenetica*, but less so after passaging on  
302 'Alternating hosts' and 'A. p. host' ( $\chi^2(2) = 6.4$ ,  $p = 0.04$  for interaction effect, Supp. Table 2; gray panels  
303 in Fig. 3).

## 304 **DISCUSSION**

305 We investigated the evolution of host specialization, and its underlying traits, in the microsporidian  
306 parasites *A. rigaudi* and *E. artemiae*. In the field, these parasites infect two sympatric species of *Artemia*,  
307 each with a degree of host specialization: *A. rigaudi* is preferentially adapted to *A. parthenogenetica*,  
308 and *E. artemiae* to *A. franciscana* (the “matched” hosts, Lievens et al. 2018). To test whether this  
309 pattern is shaped by host availability or by fitness trade-offs, we experimentally evolved the parasites on  
310 one or both of their natural hosts. We found that the parasites remained partially specialized in all  
311 passaging conditions. The different parasite traits did not play an equal role in this outcome: spore  
312 production remained specialized in both parasites, infectivity showed a generalist pattern in *A. rigaudi*  
313 and readily evolved towards generalism in *E. artemiae*, and virulence played a minor role. Our results  
314 are consistent with a strong trade-off acting on spore production and a weak trade-off on infectivity,  
315 and suggest that spore production is the key trait preventing the evolution of generalism in this system.

### 316 *The evolution of specialization and its underlying traits*

317 Our first conclusion is that both *A. rigaudi* and *E. artemiae* display a robust pattern of specialization: the  
318 fitness of both microsporidians was higher in the matched hosts than in the mismatched hosts, even  
319 after extended passaging on the latter (Fig. 3, gray panels). This result is consistent with our previous  
320 ecology- and life history-based findings (Lievens et al. 2018, 2019).

321 *A. rigaudi*'s specialization for *A. parthenogenetica* was caused by a disparity in spore production. This  
322 parasite produced many more spores in *A. parthenogenetica*. Neither infectivity nor spore production  
323 changed detectably during the serial passages, but the passaging treatment did affect virulence (Fig. 3).

324 When tested in *A. parthenogenetica*, *A. rigaudi* lines that had evolved on that host were less virulent  
325 than lines that had evolved on *A. franciscana*. Whether this was due to an incidentally high virulence on  
326 a ‘novel’ host, or to an adaptive decrease in virulence on a ‘known’ host, is unknown, but both are  
327 plausible (Woolhouse et al. 2001, Alizon et al. 2009). The effect of virulence on overall fitness was minor,  
328 however, so the parasite stayed equally specialized for *A. parthenogenetica* in all treatments (Fig. 3, gray  
329 panels).

330 For *E. artemiae*, specialization was apparent for spore production and infectivity. *E. artemiae* spores had  
331 a higher chance of infecting *A. franciscana*, and *E. artemiae* infections also produced more spores in *A.*  
332 *franciscana* (Fig. 3). Compounded, these two traits produce a clear pattern of specialization (Fig. 3, gray  
333 panels). Unlike that of *A. rigaudi*, however, *E. artemiae*’s fitness did evolve in some treatments. *E.*  
334 *artemiae* lines whose passaging history included *A. parthenogenetica* had a higher fitness on this host,  
335 while their fitness in *A. franciscana* was not detectably changed (compare cross & circle to triangle in  
336 Fig. 3). *E. artemiae* can thus evolve a more generalist strategy without a detectable trade-off. This  
337 observation supports the mounting evidence that “costs” of adaptation to different environments may  
338 not always be present, as expected theoretically (Fry 1996, Lenormand et al. 2018) and observed  
339 empirically (Falconer 1990, Agrawal 2000, Kassen 2002, Nidelet and Kaltz 2007, Magalhães et al. 2009,  
340 Bedhomme et al. 2012, Remold 2012, Gallet et al. 2014, Messina and Durham 2015). *E. artemiae*’s  
341 fitness change was driven by a change in infectivity, while virulence and spore production were static.  
342 Interestingly, changes in infectivity have also been found to drive the evolution of specialists and  
343 generalists in the microsporidian *Brachiola algerae*, although in this case there was a correlated loss of  
344 infectivity in other hosts (Legros and Koella 2010).

345 The difference in infectivity among the evolved lines of *E. artemiae* can be interpreted in two ways: its  
346 infectivity in *A. parthenogenetica* either decreased when the parasite was no longer exposed to this  
347 host, or increased when the parasite was forced to persist in it. We consider the second to be more  
348 likely. Overall, evolution is likely to have occurred from standing genetic variation, because we tried to  
349 maximize the diversity of our microsporidian stocks and used large inoculum sizes. However, *de novo*  
350 mutations may also have arisen due to the large population sizes (Fig. 2) and appreciable duration of the  
351 experiment (> 40x the time necessary for a detectable intra-host population to accumulate, Rode et al.  
352 2013a). A decrease of infectivity when *E. artemiae* was not exposed to *A. parthenogenetica* could have  
353 been achieved by an increase in frequency of conditionally deleterious genotypes - neutral in *A.*  
354 *franciscana* and deleterious in *A. parthenogenetica* (de novo, Kawecki 1994, or by drift, Yourth and

355 Schmid-Hempel 2006). However, given the large population sizes during serial passaging (Fig. 2), we  
356 doubt that such processes occurred. It is more likely that passaging on *A. parthenogenetica* caused  
357 genotypes that were better suited to this species to accumulate. This hypothesis is also supported by  
358 previous experimental results, which describe the infectivity of the stock population of *E. artemiae* as  
359 resembling that of the 'A. f. host' evolved lines (Lievens et al. 2018). If so, adaptation likely occurred  
360 through an increase in frequency of genotypes that were beneficial in *A. parthenogenetica* and neutral  
361 in *A. franciscana*. Another possibility is that adaptation occurred in all passaging treatments, but that  
362 adaptation to *A. parthenogenetica* had an incidental positive effect in *A. franciscana* that matched the  
363 adaptation to the 'A. f. host' treatment.

364 *E. artemiae*'s virulence did not differ among treatments at the end of the serial passaging, and we found  
365 no evidence that it evolved over the course of the experiment. In particular, we found no evidence that  
366 the high death rates caused by *E. artemiae* in *A. franciscana* between P4 and P6 were caused by a higher  
367 virulence (Supp. Fig. 2). Instead, demographic effects were the likely culprit: *E. artemiae*'s spore  
368 production in *A. franciscana* does not plateau at a certain maximum (Lievens et al. unpublished data), so  
369 a higher infective dose in this combination might lead to a higher transmission rate, which would  
370 increase the infective dose and so on, until the number of invading spores was so high that recipient  
371 hosts were overwhelmed (e.g. Ebert et al. 2000).

### 372 *Trade-offs in infectivity and spore production*

373 An important advantage of this study is that *A. rigaudi* and *E. artemiae* share the same context: the two  
374 parasites are ecologically similar, sympatric, and infect the same host species, so we can reasonably  
375 expect that they are subject to similar life history and environmental constraints. Below, we take  
376 advantage of this to compare the evolved changes in infectivity and spore production for the two  
377 microsporidians, arriving at the compelling conclusion that the strength of their life history trade-offs is  
378 trait-dependent, but that the traits respond similarly in the two species.

379 The observed changes in infectivity can be explained by the existence of a weak trade-off between  
380 infectivity in *A. franciscana* and *A. parthenogenetica*. Consider first *E. artemiae*, whose ability to infect *A.*  
381 *parthenogenetica* improved when passaged on that host, without attendant losses in *A. franciscana*.  
382 Such cost-free adaptation could arise if the ancestral 'A. franciscana-adapted' infectivity of *E. artemiae*  
383 was located slightly below the boundary of a weak trade-off curve (such as would be expected if the  
384 ancestral population was not perfectly adapted to the conditions of the experiment, Fry 2003). There  
385 would then be little improvement possible in *E. artemiae*'s fitness on *A. franciscana*, but a substantial

386 improvement in *A. parthenogenetica* could easily be achieved (blue arrow in Fig. 4)(Martin and  
387 Lenormand 2015), as seen when *E. artemiae* was passaged on this host (Fig. 3). The infectivity of *A.*  
388 *rigaudi* can be interpreted in the same context. *A. rigaudi*'s ancestral infectivity is largely generalist  
389 (Lievens et al. 2018), so that the potential improvements in fitness would be small in either direction,  
390 thus producing the unchanged infectivity that we observed across treatments (Fig. 3).

391 The weak trade-off model implies that the evolution of generalist infectivity should be straightforward,  
392 begging the question of why *E. artemiae*'s ancestral population remained specialized for this trait. We  
393 speculate that the specialization is maintained by source-sink dynamics in the natural host-parasite  
394 community. In the field, *E. artemiae* is present year-round. *A. parthenogenetica* hosts are only present  
395 from late spring to fall, so the parasite population predominantly infects, and evolves on, *A. franciscana*  
396 (Lievens et al. 2019). In this case, adaptations towards increased infectivity in the mismatched host may  
397 be continually eroded by selection in the matched host (Holt and Hochberg 2002, Lenormand 2002). By  
398 forcing *E. artemiae* to evolve on *A. parthenogenetica*, we blocked these source-sink dynamics, allowing  
399 generalist infectivity to evolve. In comparison, *A. rigaudi* almost exclusively occur in communities  
400 containing both host species (Lievens et al. 2019), potentially explaining why this microsporidian had  
401 already evolved generalist infectivity. Of course, other factors than demography could affect the  
402 evolution of infectivity in the field, including trade-offs with other traits (Alizon and Michalakis 2015)  
403 and competition between parasites (Mideo 2009).

404 The second important trait for *A. rigaudi* and *E. artemiae* was spore production, which remained  
405 strongly specialized in all treatments (Fig. 3). This unresponsiveness to the evolutionary treatment could  
406 have three explanations. First, high stochastic variation in our experimental design (drift and  
407 measurement error) could deprive us of the power to detect any adaptive change. The increased  
408 infectivity observed for *E. artemiae* makes this explanation unconvincing for any trait under similar  
409 levels of selection. As spore production is directly related to parasite fitness, there is no reason to expect  
410 weaker selection on this trait compared to infectivity. Second, there could be a complete lack of genetic  
411 diversity in this trait – either in the initial inocula or due to *de novo* mutations. This explanation is also  
412 unlikely given the way we assembled our initial inoculum (see above) and the observation of a genetic  
413 response in other traits (virulence in *A. rigaudi* and infectivity in *E. artemiae*). The populations we used  
414 were not generally devoid of genetic variation, and there is no reason to expect that mutation rates are  
415 inherently lower for spore production. We also observed phenotypic variation for spore production trait  
416 among lines (Supp. Fig. 3), which reinforces this point. The third explanation, which we decidedly favor,

417 is that there is a strong trade-off between spore production in *A. franciscana* and spore production in *A.*  
418 *parthenogenetica*. Such a trade-off would allow small improvements in the direction of increased  
419 specialization (black arrows in Fig. 4), but make improvements on the novel host much more difficult to  
420 achieve (red arrows in Fig. 4), thereby preventing the emergence of more generalist phenotypes.  
421 Mechanistically, a strong trade-off could be related to the distinct strategies of host exploitation  
422 necessary to thrive in *A. franciscana* and *A. parthenogenetica*. The precise physiology of the host species  
423 is likely to be different (they have been diverging for an estimated 40 million years, Baxevanis et al.  
424 2006), and indeed the mechanisms of virulence and within-host regulation employed by *A. rigaudi* and  
425 *E. artemiae* in their matched hosts differ (Lievens et al. 2018, Lievens et al. unpublished data), with *A.*  
426 *rigaudi* causing more survival virulence, and *E. artemiae* more reproductive virulence. Successful  
427 exploitation of *A. franciscana* and *A. parthenogenetica* could therefore require very different toolkits,  
428 preventing the evolution of generalism and reducing the likelihood of a host switch (cf. Gemmill et al.  
429 2000).

430 Taken together, our results provide strong evidence that the microsporidians' traits are constrained by  
431 different trade-off shapes. Intriguingly, while the trade-offs are trait-specific, they are not species-  
432 specific. It seems that while *A. franciscana* and *A. parthenogenetica* are not physiologically similar  
433 enough to allow the evolution of generalism, *A. rigaudi* and *E. artemiae* are ecologically similar enough  
434 to share the same constraints.

### 435 *Perspectives*

436 Overall, we find that the natural specialization of *A. rigaudi* and *E. artemiae* is primarily shaped by a  
437 strong trade-off acting on spore production. Spore production is therefore a key trait blocking the  
438 evolution of generalism. However, host availability did affect the degree of specialization, by allowing  
439 the evolution of generalist infectivity. We therefore predict that the natural population of *E. artemiae*  
440 may eventually evolve to become less specific, as *A. rigaudi* is, but that neither parasite is likely to  
441 become a true generalist or to switch hosts.

442 It is worth noting that our conclusions would have been very different if we had not measured the  
443 parasites' traits separately. Based on the overall fitness (gray panels in Fig. 3), we would have concluded  
444 that *A. rigaudi* was unable to adapt to its mismatched host, while *E. artemiae* was able to evolve  
445 towards generalism after exposure to *A. parthenogenetica*. This would have suggested that the two  
446 parasites had asymmetrical fitness trade-offs between hosts: a strong trade-off for *A. rigaudi*, and a  
447 weaker trade-off for *E. artemiae*. Ignoring the individual traits, therefore, can have important



448 consequences for the interpretation of field patterns, and for the prediction of a parasite's future  
449 evolution. Our results suggest that more theoretical studies of specialization should be set in a multi-  
450 trait context, with each trait able to exhibit weak or strong trade-offs and evolve accordingly. Such  
451 studies would be better equipped to describe the continuum between generalist and specialist  
452 strategies, and to single out the traits favoring their evolution.

#### 453 **ACKNOWLEDGEMENTS**

454 We thank C. Gilliot for her help establishing the stock populations, and C. Gilliot and T. Mathieu for their  
455 help designing the experimental equipment. We are also grateful to R. Zahab for her assistance with  
456 PCRs, and to R. Zahab, L. Olazcuaga, and J. Pantel for helping out in times of need. E. J. P. L. received  
457 financial support from a French Ministry of Research fellowship. TL and YM acknowledge support from  
458 CNRS and IRD.

#### 459 **CONFLICT OF INTEREST**

460 The authors of this preprint declare that they have no financial conflict of interest with the content of  
461 this article. TL is one of the PCI Evolutionary Biology recommenders.

#### 462 **DATA ACCESSIBILITY**

463 Data and analyses have been uploaded to Zenodo, doi 10.5281/zenodo.3476544 .

464 **REFERENCES**

- 465 Agrawal, A. A. 2000. Host-range evolution: Adaptation and trade-offs in fitness of mites on alternative  
466 hosts. *Ecology* 81:500–508.
- 467 Agudelo-Romero, P., F. de la Iglesia, and S. F. Elena. 2008. The pleiotropic cost of host-specialization in  
468 Tobacco etch polyvirus. *Infection, Genetics and Evolution* 8:806–814.
- 469 Alizon, S., A. Hurford, N. Mideo, and M. Van Baalen. 2009. Virulence evolution and the trade-off  
470 hypothesis: history, current state of affairs and the future. *Journal of Evolutionary Biology* 22:245–  
471 59.
- 472 Alizon, S., and Y. Michalakis. 2015. Adaptive virulence evolution: the good old fitness-based approach.  
473 *Trends in Ecology and Evolution* 30:248–254.
- 474 Amat, F., F. Hontoria, O. Ruiz, A. J. Green, M. I. Sánchez, J. Figuerola, and F. Hortas. 2005. The American  
475 brine shrimp as an exotic invasive species in the western Mediterranean. *Biological Invasions* 7:37–  
476 47.
- 477 Antonovics, J., M. Hood, and J. Partain. 2002. The ecology and genetics of a host shift: *Microbotryum* as  
478 a model system. *The American Naturalist* 160:S40–S53.
- 479 Bates, D., M. Maechler, B. Bolker, and S. Walker. 2015. Fitting Linear Mixed-Effects Models Using lme4.  
480 *Journal of Statistical Software* 67:1–48.
- 481 Baxevanis, A. D., I. Kappas, and T. J. Abatzopoulos. 2006. Molecular phylogenetics and asexuality in the  
482 brine shrimp *Artemia*. *Molecular Phylogenetics and Evolution* 40:724–738.
- 483 Bedhomme, S., G. Lafforgue, and S. F. Elena. 2012. Multihost experimental evolution of a plant RNA  
484 virus reveals local adaptation and host-specific mutations. *Molecular Biology and Evolution*  
485 29:1481–1492.
- 486 Bell, G., and X. Reboud. 1997. Experimental evolution in *Chlamydomonas* II. Genetic variation in strongly  
487 contrasted environments. *Heredity* 78:1–11.
- 488 Benmayer, R., D. J. Hodgson, G. G. Perron, and A. Buckling. 2009. Host Mixing and Disease Emergence.  
489 *Current Biology* 19:764–767.
- 490 Bono, L. M., C. L. Gensel, D. W. Pfennig, and C. L. Burch. 2015. Evolutionary rescue and the coexistence  
491 of generalist and specialist competitors: an experimental test. *Proceedings of the Royal Society of  
492 London B: Biological Sciences* 282:20151932.
- 493 Ching, J., S. A. Musheyev, D. Chowdhury, J. A. Kim, Y. Choi, and J. J. Dennehy. 2013. Migration enhances  
494 adaptation in bacteriophage populations evolving in ecological sinks. *Evolution* 67:10–17.

- 495 Cleaveland, S., M. K. Laurenson, and L. H. Taylor. 2001. Diseases of humans and their domestic  
496 mammals: pathogen characteristics, host range and the risk of emergence. *Philosophical*  
497 *Transactions of the Royal Society B: Biological Sciences* 356:991–9.
- 498 Ebert, D., C. D. Zschokke-Rohringer, and H. J. Carius. 2000. Dose effects and density-dependent  
499 regulation of two microparasites of *Daphnia magna*. *Oecologia* 122:200–209.
- 500 Falconer, D. S. 1990. Selection in different environments: effects on environmental sensitivity (reaction  
501 norm) and on mean performance. *Genetical Research* 56:57.
- 502 Fellous, S., G. Angot, M. Orsucci, A. Migeon, P. Auger, I. Olivieri, and M. Navajas. 2014. Combining  
503 experimental evolution and field population assays to study the evolution of host range breadth.  
504 *Journal of Evolutionary Biology* 27:911–919.
- 505 Fry, J. D. 1996. The evolution of host specialization: are trade-offs overrated? *The American Naturalist*  
506 148:S84–S107.
- 507 Fry, J. D. 2003. Detecting ecological trade-offs using selection experiments. *Ecology* 84:1672–1678.
- 508 Futuyma, D. J., and G. Moreno. 1988. The Evolution of Ecological Specialization. *Annual Review of*  
509 *Ecology and Systematics* 19:207–233.
- 510 Gallet, R., Y. Latour, B. S. Hughes, and T. Lenormand. 2014. The dynamics of niche evolution upon abrupt  
511 environmental change. *Evolution* 68:1257–1269.
- 512 Gemmill, A. W., M. E. Viney, and A. F. Read. 2000. The evolutionary ecology of host-specificity:  
513 experimental studies with *Strongyloides ratti*. *Parasitology* 120:429–437.
- 514 Hall, M. D., G. Bento, and D. Ebert. 2017. The evolutionary consequences of stepwise infection  
515 processes. *Trends in Ecology & Evolution* 32:612–623.
- 516 Hall, S. R., C. R. Becker, J. L. Simonis, M. A. Duffy, A. J. Tessier, and C. E. Cáceres. 2009. Friendly  
517 competition: evidence for a dilution effect among competitors in a planktonic host-parasite  
518 system. *Ecology* 90:791–801.
- 519 Hereford, J. 2009. A quantitative survey of local adaptation and fitness trade-offs. *The American*  
520 *Naturalist* 173:579–88.
- 521 Holt, R. D., and M. S. Gaines. 1992. Analysis of adaptation in heterogeneous landscapes: implications for  
522 the evolution of fundamental niches. *Evolutionary Ecology* 6:433–447.
- 523 Holt, R. D., and M. E. Hochberg. 2002. Virulence on the edge: a source-sink perspective. Pages 104–119  
524 *in* U. Dieckmann, J. A. J. Metz, M. W. Sabelis, and K. Sigmund, editors. *Adaptive dynamics of*  
525 *infectious diseases: in pursuit of virulence management*. Cambridge University Press, Cambridge,  
526 UK.

- 527 Hothorn, T., F. Bretz, and P. Westfall. 2008. Simultaneous Inference in General Parametric Models.  
528 Biometrical Journal 50:346–363.
- 529 Jaenike, J., and I. Dombeck. 1998. General-purpose genotypes for host species utilization in a nematode  
530 parasite of *Drosophila*. Evolution 52:832–840.
- 531 Kassen, R. 2002. The experimental evolution of specialists, generalists, and the maintenance of diversity.  
532 Journal of Evolutionary Biology 15:173–190.
- 533 Kawecki, T. J. 1994. Accumulation of deleterious mutations and the evolutionary cost of being a  
534 generalist. The American Naturalist 144:833–838.
- 535 Kelly, D. W., R. A. Paterson, C. R. Townsend, R. Poulin, and D. M. Tompkins. 2009. Parasite spillback: A  
536 neglected concept in invasion ecology? Ecology 90:2047–2056.
- 537 Legros, M., and J. C. Koella. 2010. Experimental evolution of specialization by a microsporidian parasite.  
538 BMC Evolutionary Biology 10:159.
- 539 Lenormand, T. 2002. Gene flow and the limits to natural selection. Trends in Ecology and Evolution  
540 17:183–189.
- 541 Lenormand, T., N. Harmand, and R. Gallet. 2018. Cost of resistance: an unreasonably expensive concept.  
542 Rethinking Ecology 3:51–70.
- 543 Lenth, R. V. 2016. Least-Squares Means: The R Package lsmeans. Journal of Statistical Software 69:1–33.
- 544 Lievens, E. J. P., J. M. A. Perreau, P. Agnew, Y. Michalakis, and T. Lenormand. 2018. Decomposing  
545 parasite fitness reveals the basis of specialization in a two-host, two-parasite system. Evolution  
546 Letters 2:390–405.
- 547 Lievens, E. J. P., N. O. Rode, J. Landes, A. Segard, R. Jabbour-Zahab, Y. Michalakis, and T. Lenormand.  
548 2019. Long-term prevalence data reveals spillover dynamics in a multi-host (*Artemia*), multi-  
549 parasite (Microsporidia) community. International Journal for Parasitology.
- 550 Magalhães, S., E. Blanchet, M. Egas, and I. Olivieri. 2009. Are adaptation costs necessary to build up a  
551 local adaptation pattern? BMC Evolutionary Biology 9:182.
- 552 Magalhães, S., a. Cailleau, E. Blanchet, and I. Olivieri. 2014. Do mites evolving in alternating host plants  
553 adapt to host switch? Journal of Evolutionary Biology 27:1956–1964.
- 554 Martin, G., and T. Lenormand. 2015. The fitness effect of mutations across environments: Fisher's  
555 geometrical model with multiple optima. Evolution 69:1433–1447.
- 556 Meaden, S., and B. Koskella. 2017. Adaptation of the pathogen, *Pseudomonas syringae*, during  
557 experimental evolution on a native vs. alternative host plant. Molecular Ecology 26:1790–1801.

- 558 Messina, F. J., and S. L. Durham. 2015. Loss of adaptation following reversion suggests trade-offs in host  
559 use by a seed beetle. *Journal of Evolutionary Biology* 28:1882–1891.
- 560 Mideo, N. 2009. Parasite adaptations to within-host competition. *Trends in Parasitology* 25:261–268.
- 561 Nidelet, T., and O. Kaltz. 2007. Direct and correlated responses to selection in a host-parasite system:  
562 testing for the emergence of genotype specificity. *Evolution* 61:1803–1811.
- 563 Poullain, V., S. Gandon, M. A. Brockhurst, A. Buckling, and M. E. Hochberg. 2008. The evolution of  
564 specificity in evolving and coevolving antagonistic interactions between a bacteria and its phage.  
565 *Evolution* 62:1–11.
- 566 Prenter, J., C. MacNeil, J. T. A. Dick, and A. M. Dunn. 2004. Roles of parasites in animal invasions. *Trends*  
567 *in Ecology and Evolution* 19:385–390.
- 568 R Core Team. 2014. R: A language and environment for statistical computing. R Foundation for Statistical  
569 Computing, Vienna, Austria.
- 570 Ravigné, V., U. Dieckmann, and I. Olivieri. 2009. Live where you thrive: joint evolution of habitat choice  
571 and local adaptation facilitates specialization and promotes diversity. *The American Naturalist*  
572 174:E141–E169.
- 573 Reeve, M. R. 1963. The filter-feeding of *Artemia* I. In pure cultures of plant cells. *The Journal of*  
574 *Experimental Biology* 40:195–205.
- 575 Refardt, D., and D. Ebert. 2006. Quantitative PCR to detect, discriminate and quantify intracellular  
576 parasites in their host: an example from three microsporidians in *Daphnia*. *Parasitology* 133:11–8.
- 577 Remold, S. 2012. Understanding specialism when the Jack of all trades can be the master of all.  
578 *Proceedings of the Royal Society of London, Series B* 279:4861–9.
- 579 Rode, N. O., J. Landes, E. J. P. Lievens, E. Flaven, A. Segard, R. Jabbour-Zahab, Y. Michalakis, P. Agnew, C.  
580 P. Vivarès, and T. Lenormand. 2013a. Cytological, molecular and life cycle characterization of  
581 *Anostracospora rigaudi* n. g., n. sp. and *Enterocytophora artemiae* n. g., n. sp., two new  
582 microsporidian parasites infecting gut tissues of the brine shrimp *Artemia*. *Parasitology* 140:1168–  
583 85.
- 584 Rode, N. O., E. J. P. Lievens, A. Segard, E. Flaven, R. Jabbour-Zahab, and T. Lenormand. 2013b. Cryptic  
585 microsporidian parasites differentially affect invasive and native *Artemia* spp. *International Journal*  
586 *for Parasitology* 43:795–803.
- 587 Ronce, O., and M. Kirkpatrick. 2001. When sources become sinks: migrational meltdown in  
588 heterogeneous habitats. *Evolution* 55:1520–1531.
- 589 Schmid-Hempel, P. 2011. *Evolutionary parasitology: the integrated study of infections, immunology, and*  
590 *genetics*. Oxford University Press, Oxford, UK.

- 591 Streicker, D. G., A. Fenton, and A. B. Pedersen. 2013. Differential sources of host species heterogeneity  
592 influence the transmission and control of multihost parasites. *Ecology Letters* 16:975–984.
- 593 Therneau, T. M. 2014. A Package for Survival Analysis in S.
- 594 Turner, P. E., and S. F. Elena. 2000. Cost of host radiation in an RNA virus. *Genetics* 156:1465–1470.
- 595 Woolhouse, M. E. J., L. H. Taylor, and D. T. Haydon. 2001. Population Biology of Multihost Pathogens.  
596 *Science* 292:1109–1112.
- 597 Yourth, C. P., and P. Schmid-Hempel. 2006. Serial passage of the parasite *Crithidia bombi* within a colony  
598 of its host, *Bombus terrestris*, reduces success in unrelated hosts. *Proceedings of the Royal Society*  
599 of London, Series B 273:655–659.

600 **TABLES**

601 **Table 1.** History of the parasite lines. Events that occurred during the serial passaging (abbreviated **H**, **H+**, and **L**) are noted at the relevant passaging step. For  
 602 the final assays, we used all the surviving parasite lines, plus a set of lines that were revived from backup spore samples (see Results and Fig. 1).

| Parasite lines     |                   |           | Passages |    |    |    |    |    |    |    |    |     | Used for final assays |                                                            |                                            |
|--------------------|-------------------|-----------|----------|----|----|----|----|----|----|----|----|-----|-----------------------|------------------------------------------------------------|--------------------------------------------|
| Parasite           | Treatment         | Replicate | P1       | P2 | P3 | P4 | P5 | P6 | P7 | P8 | P9 | P10 | Surviving line        | Revived line                                               |                                            |
| <i>A. rigaudi</i>  | <i>A. f.</i> host | 1         |          |    |    |    |    |    | H  |    |    |     | Yes                   | No                                                         |                                            |
|                    |                   | 2         |          |    |    |    |    | H  | HL |    |    |     | No (lost)             | Yes (revived from P6)                                      |                                            |
|                    |                   | 3         |          |    |    |    | L  | L  | H  |    |    |     | No (lost)             | No (no backup sample)                                      |                                            |
|                    |                   | 4         |          |    |    |    |    |    |    |    |    |     | Yes                   | No                                                         |                                            |
|                    | Alternating hosts | 1         |          |    |    |    |    |    |    |    |    |     | Yes                   | No                                                         |                                            |
|                    |                   | 2         |          |    |    |    |    |    |    |    |    |     | Yes                   | No                                                         |                                            |
|                    |                   | 3         |          |    |    |    |    |    |    |    |    |     |                       | Yes                                                        | No                                         |
|                    |                   | 4         |          | L  | L  | L  |    |    |    |    |    |     |                       | No (lost)                                                  | No (no backup sample)                      |
|                    | <i>A. p.</i> host | 1         |          |    |    |    |    |    |    |    |    |     | Yes                   | No                                                         |                                            |
|                    |                   | 2         |          |    |    |    |    |    |    |    |    |     | Yes                   | No                                                         |                                            |
|                    |                   | 3         |          |    |    |    |    |    |    |    |    |     |                       | Yes                                                        | No                                         |
|                    |                   | 4         |          |    |    |    |    |    |    |    |    |     |                       | Yes                                                        | No                                         |
| <i>E. artemiae</i> | <i>A. f.</i> host | 1         |          |    |    |    |    | H  | H  |    |    |     | Yes                   | Yes (revived from P6 to compare virulence)                 |                                            |
|                    |                   | 2         |          |    |    |    | H+ |    | H  |    |    |     | Yes                   | Yes (revived from P6 to compare virulence)                 |                                            |
|                    |                   | 3         |          |    |    |    |    |    |    |    |    |     |                       | Yes                                                        | Yes (revived from P6 to compare virulence) |
|                    |                   | 4         |          |    |    |    | H  | H+ | H  |    |    |     |                       | Yes                                                        | Yes (revived from P5 to compare virulence) |
|                    | Alternating hosts | 1         |          |    |    |    |    |    |    |    |    |     | Yes                   | No (revival from P6 to compare virulence was unsuccessful) |                                            |
|                    |                   | 2         |          |    |    |    |    |    |    |    |    |     | Yes                   | Yes (revived from P6 to compare virulence)                 |                                            |
|                    |                   | 3         |          |    |    |    |    |    |    |    |    |     |                       | Yes                                                        | No                                         |
|                    |                   | 4         |          |    |    |    |    |    |    |    |    |     |                       | Yes                                                        | No                                         |
|                    | <i>A. p.</i> host | 1         |          |    |    |    |    |    |    |    |    |     | Yes                   | No                                                         |                                            |
|                    |                   | 2         |          |    |    |    |    |    |    |    |    |     | Yes                   | No                                                         |                                            |
|                    |                   | 3         |          |    |    |    |    |    |    | L  |    |     |                       | No (lost)                                                  | No (revival from P6 was unsuccessful)      |
|                    |                   | 4         |          |    |    |    |    |    |    |    |    |     |                       | Yes                                                        | No                                         |

603 **H: Host rescue**, because  $\leq 5$  hosts survived the passaging step. To prevent a host population collapse, five additional hosts were added at the start of the  
 604 incubation period.

605 **H+: Strong host rescue**, because 0 hosts survived the passaging step. To prevent a host population collapse, the passaging step was repeated. Consequently,  
 606 the incubation period was slightly shorter.

607 **L: Lost line** due to a collapse of the parasite population. Consecutive L's indicate the loss occurred at an unknown point during these passages.

608 **Table 2.** Detection of infection in the second assay. Only hosts that died after day 10 are included here, to allow for  
609 the delay in detection time (see Supplementary Methods).

| <b>Parasite species</b>    | <b>Infected hosts</b> |
|----------------------------|-----------------------|
| <b><i>A. rigaudi</i></b>   |                       |
| <i>A. franciscana</i>      | 66 %                  |
| <i>A. parthenogenetica</i> | 70 %                  |
| <b><i>E. artemiae</i></b>  |                       |
| <i>A. franciscana</i>      | 68 %                  |
| <i>A. parthenogenetica</i> | 34 %                  |

610



611 **FIGURES**

612 **Figure 1.** Experimental evolution protocol. **Serial passages:** [1] Passage 1 (P1): a group of 40 uninfected hosts was  
613 exposed to a saturating dose of stock *A. rigaudi* or *E. artemiae* spores, and [2] the infections were allowed to  
614 incubate. [3] Passaging (P1 → P2): the infection was transmitted naturally, by placing the surviving P1 hosts in a  
615 strainer above a new group of uninfected hosts. [4] The incubation and passaging steps were repeated for P2-P10.  
616 [5] After passaging, the surviving old hosts were counted (P1-P10) and used to estimate the population size of the  
617 parasite (P1, P4, P7), produce backup spore samples (P6), or produce the spores for the final assays (P10). **Final**  
618 **assays:** [1<sup>st</sup>] An uninfected host was exposed to a low dose of evolved *A. rigaudi* or *E. artemiae* spores, and PCR-  
619 tested for the presence of the microsporidian after a short incubation period. [2<sup>nd</sup>] An uninfected host was  
620 exposed to a saturating dose of evolved *A. rigaudi* or *E. artemiae* spores, and mortality and spore production were  
621 tracked for 90 days.

**Serial passaging**

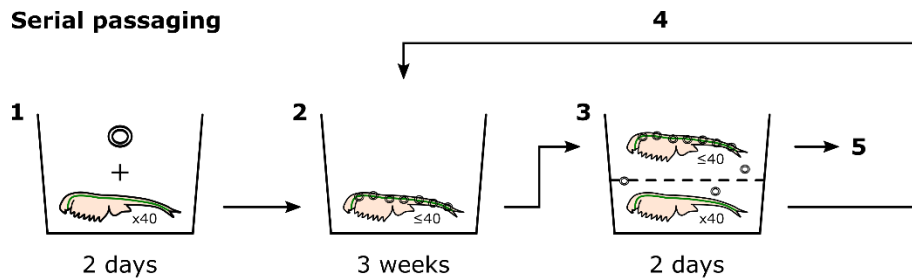

**Final assays**

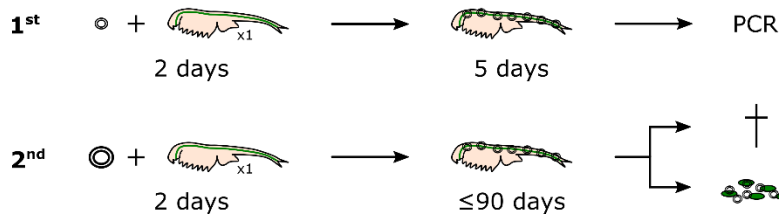

622

623

624 **Figure 2.** Host and parasite populations during the serial passing. Host survival (top row) is a compound of  
625 background host mortality and parasite-induced mortality; parasite population size (bottom row) is the spore load  
626 in the surviving old hosts after passing (*ln* scale). Lost lines (lines with a parasite population size of 0) are not  
627 included in the figure. The highest-order significant experimental variables are provided for each analysis (cf. Supp.  
628 Table 1); where relevant, the post-hoc results are shown in parentheses (see Results). Vertical bars represent the  
629 95% CIs.

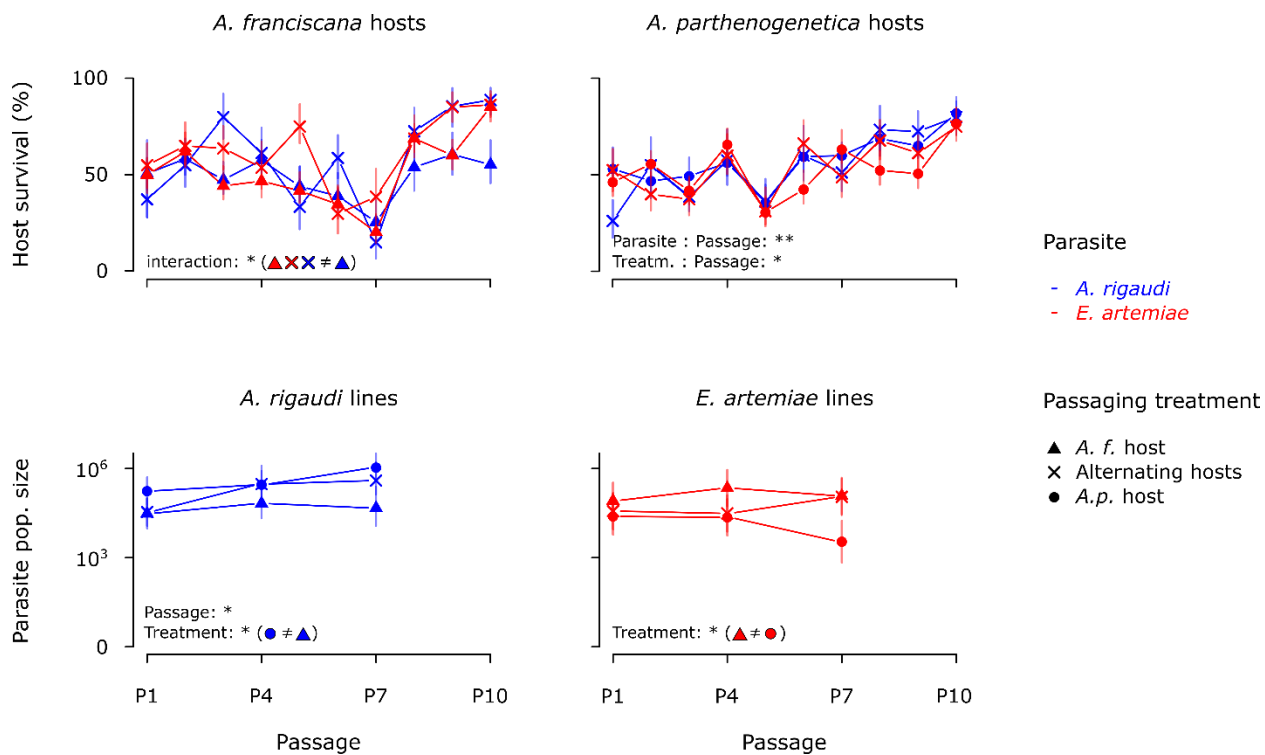

630

631

632 **Figure 3.** Results of the final assays. Infectivity, virulence, and spore production were measured directly; fitness  
 633 was calculated based on these (differentiated by the gray background). Infectivity is the percentage of hosts  
 634 infected during the first assay. Virulence and spore production were measured in the second assay: virulence is the  
 635 acceleration factor (the ratio of time-until-death) compared to the unexposed controls of the same species, spore  
 636 production is the number of spores produced per (surviving) infected host at the time of passaging ( $\ln$  scale).  
 637 Fitness is the projected number of infections at passaging ( $\ln + 1$  scale). The significant experimental variables are  
 638 noted for each microsporidian  $\times$  treatment combination (except that of *Assay host* for virulence, see Supp. Table  
 639 2). Vertical bars represent the 95% CIs.

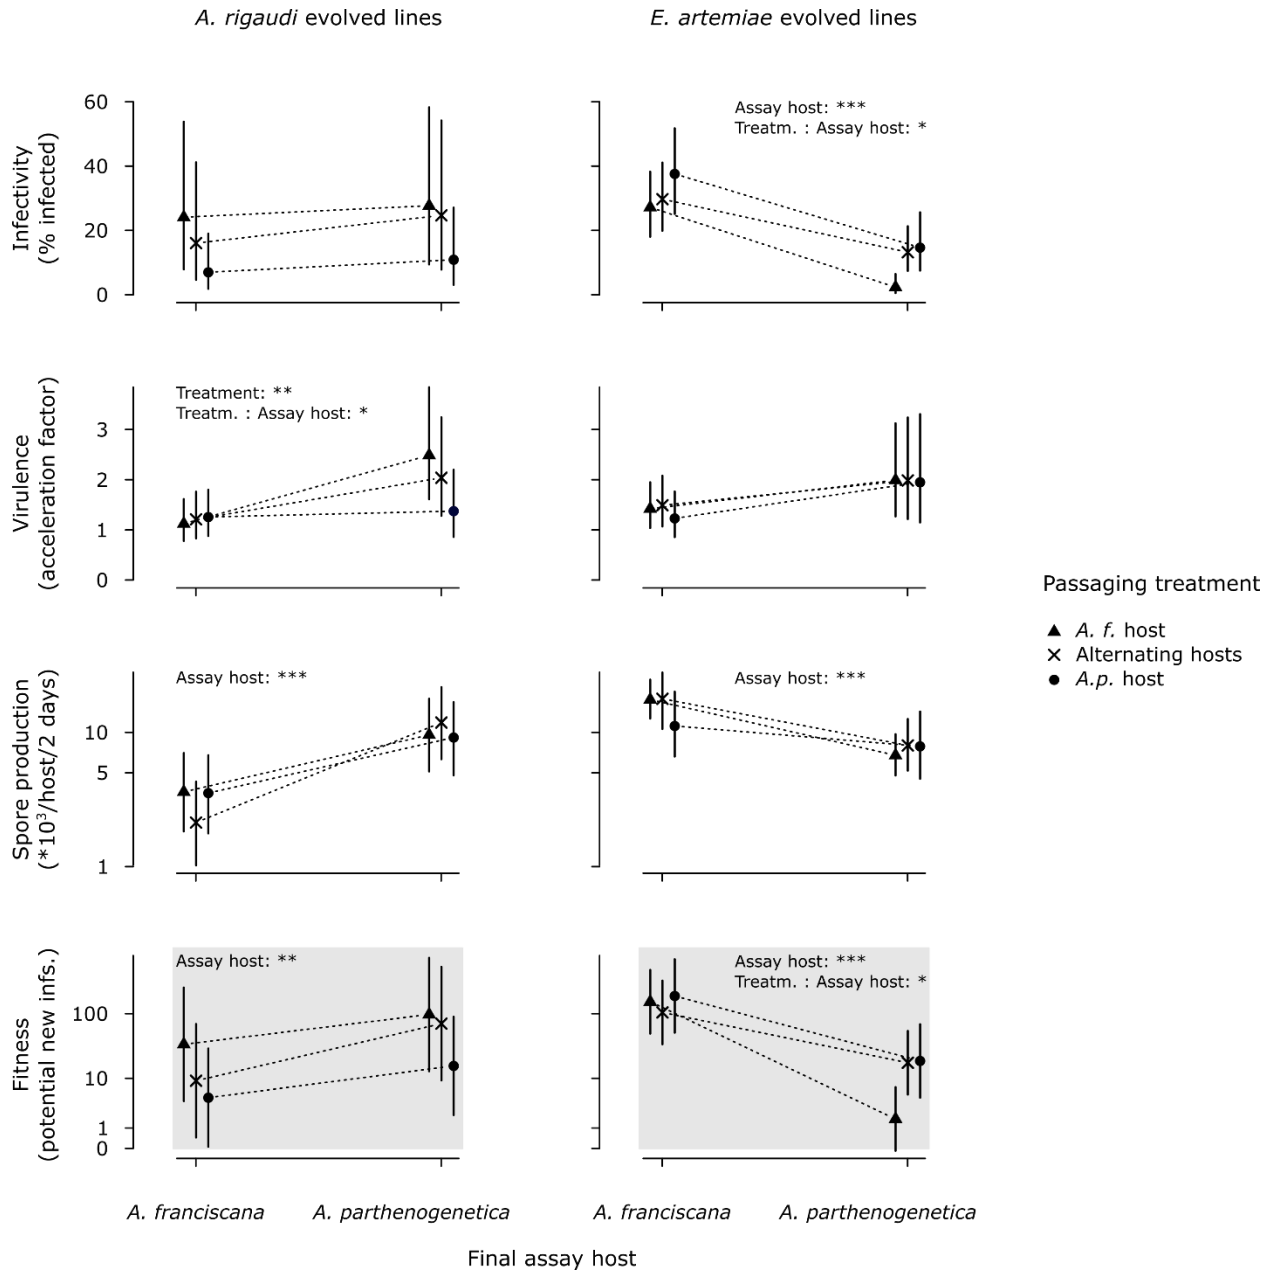

641 **Figure 4.** We speculate that the observed patterns of specialization in infectivity and spore production are  
642 determined by weak and strong trade-offs in performance between *A. franciscana* and *A. parthenogenetica* (see  
643 text for more information). Symbols: *A. rigaudi*, circle; *E. artemiae*; triangle. Black arrows, small changes are  
644 possible; blue arrow, a large change is possible; red arrows, changes in the direction of selection are not possible  
645 unless preceded by reverse specialization.

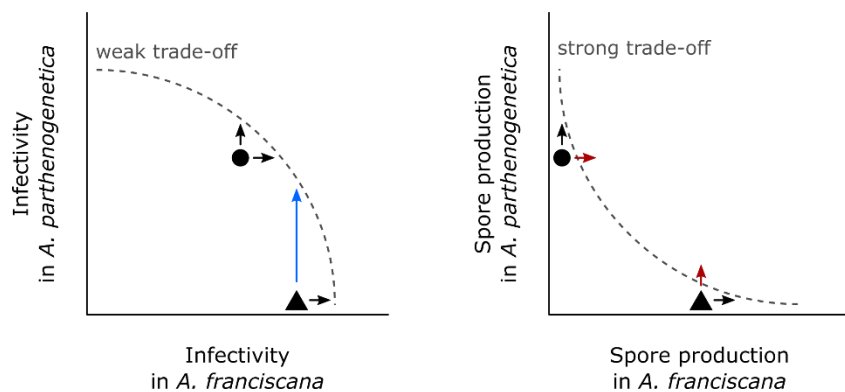

646
